---

1 **Bicolor angelfish (*Centropyge bicolor*) provides the first**  
2 **chromosome-level genome of the Pomacanthidae family**

3

4 Chunhua Li (ORCID: 0000-0002-9947-6855)<sup>1</sup>, †, Xianwei Yang (ORCID:  
5 0000-0003-4388-9674)<sup>1,3</sup>, †, Libin Shao (ORCID: 0000-0002-1789-6005)<sup>1</sup>, †, Rui  
6 Zhang (ORCID: 0000-0003-1921-9435)<sup>1</sup>, Qun Liu<sup>1</sup>(ORCID:0000-0002-5772-4929)<sup>1</sup>,  
7 Mengqi Zhang(ORCID: 0000-0002-5641-0557)<sup>1</sup>, Shanshan  
8 Liu(ORCID:0000-0002-5756-1728)<sup>1</sup>, Shanshan Pan ( ORCID:000-0001-5977-4914 )  
9 <sup>1</sup>, Weizhen Xue<sup>1</sup>(ORCID: 0000-0003-4254-2476)<sup>1</sup>, Congyan Wang<sup>1</sup>(ORCID:  
10 0000-0002-0734-5461)<sup>1</sup>, Chunyan Mao<sup>1</sup>(ORCID: 0000-0001-5394-2884)<sup>1</sup>, He Zhang  
11 (ORCID: 0000-0001-9294-1403)<sup>1,2,\*</sup>, Guangyi Fan (ORCID: 0000-0001-7365-1590)<sup>1</sup>,

12 \*

13

14 <sup>1</sup>BGI-Qingdao, BGI-Shenzhen, Qingdao 26655-5, China

15 <sup>2</sup>Department of Biology, Hong Kong Baptist University, Hong Kong, China

16 <sup>3</sup>College of Life Sciences, University of Chinese Academy of Sciences, Beijing 100049,

17 China

18

19 \*[fanguangyi@genomics.cn](mailto:fanguangyi@genomics.cn); [zhanghe@genomics.cn](mailto:zhanghe@genomics.cn)

20 †Contributed equally

21

## 22 **Abstract**

23 The Bicolor Angelfish, *Centropyge bicolor*, is a tropical coral reef fish. It is named for  
24 its striking two-color body. However, a lack of high-quality genomic data means little is  
25 known about the genome of this species. Here, we present a chromosome-level *C.*  
26 *bicolor* genome constructed using Hi-C data. The assembled genome is 650 Mbp in  
27 size, with a scaffold N50 value of 4.4 Mbp, and a contig N50 value of 114 Kbp.  
28 Protein-coding genes numbering 21,774 were annotated. Our analysis will help others  
29 to choose the most appropriate *de novo* genome sequencing strategy based on resources  
30 and target applications. To the best of our knowledge, this is the first chromosome-level  
31 genome for the Pomacanthidae family, which might contribute to further studies  
32 exploring coral reef fish evolution, diversity and conservation.

33

## 34 **Data Description**

### 35 **Background**

36 *Centropyge bicolor* (NCBI:txid109723; FishbaseID: 5454;  
37 urn:lsid:marinespecies.org:taxname:211780) (Figure 1), also known as the Bicolor,  
38 Two-Colored, or Pacific Rock Beauty Angelfish, is a showy coral reef fish commonly

39 distributed in the Indo–Pacific ocean (from East Africa to the Samoan and Phoenix  
40 Islands, north to southern Japan, south to New Caledonia; throughout Micronesia). As  
41 a member of the Pomacanthidae family, it is similar to those of the Chaetodontidae  
42 (Butterflyfishes) but is distinguished by the presence of strong preopercle spines. *C.*  
43 *bicolor* has clear boundaries between its body colors, so might be a good model in  
44 which to study body color development in coral fish<sup>[1]</sup>.

45

## 46 **Context**

47 Although the availability of genetic, and especially genomic resources, remains limited  
48 for the Pomacanthidae family, we assembled the first *C. bicolor* reference genome. This  
49 will provide valuable information for genetic studies of this coral reef fish, and will  
50 contribute to studies in body color diversity. With the whole genome sequence of *C.*  
51 *bicolor*, it might be possible to explore the genetic mechanisms of body color  
52 development in coral reef fish by comparative genomic methods.

53

## 54 **Methods and Results**

55 A protocols collection for BGISEQ-500, stLFR and Hi-C library construction is  
56 available in protocols.io (Figure 2)<sup>[2]</sup>.



**Protocols for "Bicolor Angelfish (*Centropyge bicolor*) genome provided first chromosome-level reference of Pomacanthidae family and clues for bi-color body formation"**

Nov 21, 2020

☆ Bookmark

📄 Copy / Fork

1 Works for me

🔗 Share

dx.doi.org/10.17504/protocols.io.bpxhmpj6

lichunhua

57

58 **Figure 2.** Protocols for BGISEQ-500, stLRF and Hi-C library preparation and  
59 construction, and genome assembly, for the Bicolor Angelfish, *Centropyge bicolor*<sup>[2]</sup>.

60

## 61 **Sample collection and genome sequencing**

62 A *C. bicolor* individual was collected from the market in Xiamen, Fujian Province,  
63 China. DNA was extracted from fresh muscle tissue according to a standard protocol.  
64 Single-tube long fragment read (stLFR)<sup>[2]</sup> and Hi-C libraries were constructed  
65 following the manufacturers' instructions<sup>[2,3]</sup> to sequence and assemble the genome.  
66 We obtained 130.47 Gbp (gigabase pairs; ~197×) raw stLFR data and 134.57 Gbp  
67 (~203.20×) raw Hi-C data (Table 1) using the BGISEQ-500 platform in 100-bp  
68 (basepair) paired-end mode.

69 Low-quality reads (sequences with more than 40% of bases with a quality score  
70 lower than 8), polymerase chain reaction (PCR) duplications, adaptor sequences and  
71 reads with a high (greater than 10%) proportion of ambiguous bases (Ns) occurring in  
72 stLFR data were filtered using SOAPnuke (v1.6.5; RRID:SCR\_015025)<sup>[4]</sup>. We obtained

73 62.6 Gbp (~91.67×) clean data (Table 1) to assemble the draft genome. Meanwhile,  
74 HiC-Pro (v. 2.8.0)<sup>[5]</sup> was used for the quality control of raw Hi-C data, and 42.51 Gbp  
75 (~ 64.19×) valid data were used to assemble the genome to the chromosome-level  
76 (Table 1).

77

78 **Table 1.** Statistics of DNA sequencing data.

| Libraries | Read length | Raw data          |                      | Valid data        |                      |
|-----------|-------------|-------------------|----------------------|-------------------|----------------------|
|           |             | Total bases (Gbp) | Sequencing depth (×) | Total bases (Gbp) | Sequencing depth (×) |
| stLFR     | 100:100     | 130.47            | 197.00               | 60.71             | 91.67                |
| Hi-C      | 100:100     | 134.57            | 203.20               | 42.51             | 64.19                |

79 Sequencing depth = Total bases / Genome size, where the genome size is the result of *k*-mer estimation, as shown  
80 in Table 2.

81

## 82 **Genome assembly**

83 Using GenomeScope software with stLFR clean data, *k*-mer distribution was used to  
84 understand the genome complexity before genome assembly<sup>[6]</sup>. The genome size of *C.*  
85 *bicolor* was estimated as 662.27 Mbp (megabase pairs), with 37.6% repeat sequences

86 and 1.16% heterozygous sites (Table 2, Figure 3).

87

88 **Table 2.** Statistical information of 17-mer analysis.

---

| <i>k</i> -mer | <i>k</i> -mer number | <i>k</i> -mer Depth | Heterozygosity (%) | Genome size (Mbp) |
|---------------|----------------------|---------------------|--------------------|-------------------|
| 17            | 50,994,645,240       | 77                  | 1.16               | 662.27            |

---

89 The genome size, G, was defined as  $G = K\_num/K\_depth$ , where K\_num is the total number of *k*-mers, and

90 K\_depth is the most frequently occurring *k*-mer.

91

92 We reformatted the clean stLFR data into 10× Genomics format using an in-house  
93 script([https://github.com/BGI-Qingdao/stlfr2supernova\\_pipeline](https://github.com/BGI-Qingdao/stlfr2supernova_pipeline)) and assembled the  
94 draft genome using Supernova (v.2.0.1 , RRID:SCR\_016756)<sup>[7]</sup> with default  
95 parameters. The draft genome was 681 Mbp, with a contig N50 of 115.5 Kbp (kilobase  
96 pairs) and scaffold N50 of 4.4 Mbp (Table 3), which is similar to the estimated genome  
97 size.

98

99 **Table 3.** Statistics of the draft assembly with stLFR data.

---

| Statistics | Contig | Scaffold |
|------------|--------|----------|
|------------|--------|----------|

---

---

---

|                     |             |             |
|---------------------|-------------|-------------|
| Total number (#)    | 40,442      | 29,065      |
| Total length (bp)   | 655,705,062 | 681,285,455 |
| Gap (N) (bp)        | 0           | 25,580,393  |
| Average length (bp) | 16,213.47   | 23,440.06   |
| N50 length (bp)     | 115,524     | 4,424,004   |
| N90 length (bp)     | 6,029       | 7,618       |
| Maximum length (bp) | 1,148,507   | 21,943,074  |
| Minimum length (bp) | 48          | 940         |
| GC content (%)      | 41.74       | 41.74       |

---

100

101 To obtain the chromosome-level genome, we used Juicer (v3, RRID:SCR\_017226)<sup>[8]</sup>  
102 to build a contact matrix and 3dDNA(v. 170123)<sup>[9]</sup> to sort and anchor scaffolds with  
103 the parameters: “-m haploid -s 4 -c 24”. There are 24 distinct contact blocks, which  
104 correspond to 24 chromosomes, representing 96% of the whole genome (Figure 4A,  
105 Figure 5, Table 4). On evaluating the completeness of the genome and gene set using  
106 Benchmarking Universal Single-Copy Orthologs (BUSCO,(v.3.0.2 ,  
107 RRID:SCR\_015008))<sup>[10]</sup> and a vertebrata database, our assembly maintained a score  
108 of 96.2% (Table 5). We also identified putative homologous chromosomal regions

109 between *C. bicolor* and *Oryzias latipes* by MCscanx<sup>[11]</sup>(Figure 6).

110

111 **Table 4.** Statistics of the chromosome-level genome.

| Statistics          | Contig      | Scaffold    |
|---------------------|-------------|-------------|
| Total number (#)    | 40,778      | 28,555      |
| Total length (bp)   | 655,705,062 | 680,873,932 |
| Gap (N) (bp)        | 0           | 25,168,870  |
| Average length (bp) | 16,079.87   | 23,844.30   |
| N50 length (bp)     | 113,563     | 21,943,074  |
| N90 length (bp)     | 5,988       | 7,542       |
| Maximum length (bp) | 1,148,507   | 28,105,280  |
| Minimum length (bp) | 43          | 43          |
| GC content (%)      | 41.74       | 41.74       |

112

113 **Table 5.** Statistics of the BUSCO assessment.

| Types of BUSCOs | Gene set | Assembly |
|-----------------|----------|----------|
|-----------------|----------|----------|



---

---

|                             | Number | Percentage | Number | Percentage |
|-----------------------------|--------|------------|--------|------------|
|                             |        | (%)        |        | (%)        |
| Complete BUSCOs             | 2,408  | 93.1       | 2,486  | 96.2       |
| Complete BUSCOs             |        |            |        |            |
| single-copy                 | 2,348  | 90.8       | 2,438  | 94.3       |
| Fragmented BUSCOs           | 81     | 3.1        | 64     | 2.5        |
| Missing BUSCOs              | 97     | 3.8        | 36     | 1.3        |
| Total BUSCO groups searched | 2,586  | 100        | 2,586  | 100        |

114

115     In addition, we cut off partial stLFR reads (25 M) for assembly by MitoZ with  
116 default parameters<sup>[12]</sup>, and obtained a 16,961-bp circular mitochondrial genome of *C.*  
117 *bicolor*. Thirteen protein-coding genes, 24 tRNA genes and three rRNA genes were  
118 annotated by GeSeq<sup>[13]</sup> (Figure 4B).

119

## 120 **Genomic annotation**

121 For the annotation of repeats, we carried out homolog annotation and *ab initio*  
122 prediction independently. RepeatMasker (v.4.0.6 , RRID:SCR\_012954)<sup>[14]</sup>,  
123 RepeatProteinMask (a module from RepeatMasker) and trf (Tandem Repeats Finder,

124 v.4.07b)<sup>[15]</sup> were used to identify known repetitive sequences by comparing the whole  
125 genome with RepBase<sup>[16]</sup>. LTR\_FINDER (v.1.06, RRID:SCR\_015247)<sup>[17]</sup>[15] and  
126 RepeatModeler (v.1.0.8, RRID:SCR\_015027)<sup>[18]</sup> were used in *de novo* prediction. We  
127 also classified transposable elements (TEs) from the integration of all repeats. In total,  
128 we identified 124 Mbp (18.32% of the entire genome) of repetitive sequences (Figure  
129 4A, Table 6), including 110 Mbp of TEs (Figure 4A, Table 7).

130

131 **Table 6.** Statistics of repetitive sequences.

| Type              | Repeat size (bp) | Percentage of genome (%) |
|-------------------|------------------|--------------------------|
| TRF               | 14,165,095       | 2.08                     |
| RepeatMasker      | 43,423,877       | 6.38                     |
| RepeatProteinMask | 12,503,750       | 1.84                     |
| <i>De novo</i>    | 110,871,693      | 16.28                    |
| Total             | 124,708,977      | 18.32                    |

132

133 **Table 7.** Statistics of transposable elements.

| Rebase TEs, n | Protein TEs, n | <i>De novo</i> TEs, n | Combined TEs, n |
|---------------|----------------|-----------------------|-----------------|
|---------------|----------------|-----------------------|-----------------|

---

---

|                | (%)                   | (%)                   | (%)                    | (%)                     |
|----------------|-----------------------|-----------------------|------------------------|-------------------------|
| <b>DNA</b>     | 27,163,851<br>(3.990) | 1,068,990 (0.157)     | 61,731,447<br>(9.067)  | 70,925,963 (10.417)     |
| <b>LINE</b>    | 10,228,332<br>(1.502) | 6,956,340 (1.022)     | 20,006,579<br>(2.938)  | 26,714,285 (3.924)      |
| <b>SINE</b>    | 856,125 (0.126)       | 0 (0.000)             | 497,024 (0.073)        | 1,187,676 (0.174)       |
| <b>LTR</b>     | 10,971,817<br>(1.611) | 4,485,808 (0.659)     | 16,270,071<br>(2.390)  | 23,101,529 (3.393)      |
| <b>Other</b>   | 10,041 (0.001)        | 0                     | 0                      | 10,041 (0.001)          |
| <b>Unknown</b> | 0                     | 0                     | 14,054,230<br>(2.064)  | 14,054,230 (2.064)      |
| <b>Total</b>   | 43,423,877<br>(6.378) | 12,503,750<br>(1.836) | 99,265,690<br>(14.579) | 109,868,166<br>(16.136) |

---

134

135 Homolog-based and *ab initio* prediction were used to identify the protein-coding  
136 genes. Augustus (v.3.3, RRID:SCR\_008417)<sup>[19]</sup> was used in *ab initio* prediction basing  
137 on a repeat-masked genome<sup>[20]</sup>. Protein sequences of *Astatotilapia calliptera*, *Danio*  
138 *rerio*, *Larimichthys crocea*, and *Oreochromis niloticus* were downloaded from the  
139 National Center for Biotechnology Information (NCBI) GenBank database and aligned

140 to the *C. bicolor* genome for homolog gene annotation with Genewise (v2.4.1,  
 141 RRID:SCR\_015054)<sup>[21]</sup>. Finally, we used GLEAN<sup>[22]</sup> to integrate all the above  
 142 evidence and obtained a total of 21,774 genes, which contained 11 exons on average  
 143 and had an average coding sequence (CDS) length of 1,575 bp (Table 8).

144

145 **Table 8.** Statistics of the predicted genes in the bicolor angelfish genome.

|                      | Gene   | Average    | Average  | Average  | Average | Average   |
|----------------------|--------|------------|----------|----------|---------|-----------|
| Gene set             | number | transcript | CDS      | intron   | exon    | exons per |
|                      |        | length     | length   | length   | length  | gene      |
|                      |        | (bp)       | (bp)     | (bp)     | (bp)    |           |
| <i>Astatotilapia</i> | 51,174 | 21,762.29  | 2,259.23 | 1,691.33 | 180.29  | 12.53     |
| <i>calliptera</i>    |        |            |          |          |         |           |
| <i>Danio rerio</i>   | 22,005 | 27,982.75  | 1,570.36 | 3,438.82 | 180.90  | 8.68      |
| <b>Homolog</b>       |        |            |          |          |         |           |
| <i>Larimichthys</i>  | 47,419 | 19,884.78  | 2,139.39 | 1,575.94 | 174.50  | 12.26     |
| <i>crocea</i>        |        |            |          |          |         |           |
| <i>Oreochromis</i>   | 47,067 | 17,771.04  | 1,906.97 | 1,608.29 | 175.53  | 10.86     |
| <i>niloticus</i>     |        |            |          |          |         |           |
| <b>De novo</b>       |        |            |          |          |         |           |
| Augustus             | 34,470 | 9,675.42   | 1,335.20 | 1,344.81 | 185.40  | 7.20      |

---

|              |        |           |          |          |        |       |
|--------------|--------|-----------|----------|----------|--------|-------|
| <b>GLEAN</b> | 21,774 | 14,024.40 | 1,906.28 | 1,206.07 | 172.55 | 11.05 |
|--------------|--------|-----------|----------|----------|--------|-------|

---

146 The GLEAN gene set is the integrated result of *de novo* gene predictions and homolog gene predictions.

147

148 To predict gene functions, 21,774 genes were aligned against several public

149 databases, including TrEMBL<sup>[23]</sup>, SwissProt<sup>[23]</sup>, KEGGViewer<sup>[24]</sup> and InterProScan<sup>[25]</sup>.

150 As a result, 99.67% of all genes were predicted functionally (Table 9, Figure 7).

151 **Table 9.** Statistics of the functional annotation.

---

| <b>Database</b> | <b>Number</b> | <b>Percentage (%)</b> |
|-----------------|---------------|-----------------------|
| Total           | 21,774        | 100.00                |
| SwissProt       | 20,784        | 95.45                 |
| KEGG            | 19,168        | 88.03                 |
| TrEMBL          | 21,688        | 99.61                 |
| Interpro        | 20,153        | 92.56                 |
| Overall         | 21,702        | 99.67                 |

---

152

### 153 **Phylogenetic analysis**

154 We downloaded the gene data of seven representative teleost fishes from NCBI to

155 study the phylogenetic relationships between *C. bicolor*. These seven fishes were:  
156 *Danio rerio*, *Gasterosteus aculeatus*, *Gadus morhua*, *Larimichthys crocea*, *Oryzias*  
157 *latipes*, *Oreochromis niloticus* and *Tetraodon nigroviridis*. For each dataset, the  
158 longest transcripts were selected and aligned to each other by BLASTP (v2.9.0,  
159 RRID:SCR\_001010)<sup>[26]</sup> (E-value  $\leq 1e-5$ ). TreeFam (v.2.0.9, RRID:SCR\_013401)<sup>[27]</sup>  
160 was used to cluster gene families, with default parameters. Among all 20,706 clustered  
161 gene families, there were 4,450 common single-copy families and 57 families specific  
162 to *C. bicolor* (Table 10). With single-copy sequences, we used PhyML  
163 (v.3.3,RRID:SCR\_014629)<sup>[28]</sup> to construct the phylogenetic tree of *C. bicolor* and the  
164 seven other fishes mentioned above, setting *D. rerio* as an outgroup.

165

166 **Table 10. Statistics of gene family clustering.**

| Species             | Total genes | Unclustered genes | Families | Unique families | Average number of genes per family |
|---------------------|-------------|-------------------|----------|-----------------|------------------------------------|
| <i>Centropyge</i>   | 21,774      | 694               | 16,219   | 57              | 1.3                                |
| <i>bicolor</i>      |             |                   |          |                 |                                    |
| <i>Danio rerio</i>  | 30,067      | 2,188             | 18,575   | 726             | 1.5                                |
| <i>Gasterosteus</i> | 20,756      | 784               | 15,921   | 16              | 1.25                               |
| <i>aculeatus</i>    |             |                   |          |                 |                                    |
| <i>Gadus morhua</i> | 19,987      | 535               | 15,630   | 9               | 1.24                               |
| <i>Larimichthys</i> | 24,403      | 610               | 17,273   | 55              | 1.38                               |
| <i>crocea</i>       |             |                   |          |                 |                                    |

---

---

|                               |        |       |        |    |      |
|-------------------------------|--------|-------|--------|----|------|
| <i>Oryzias latipes</i>        | 19,535 | 1,048 | 14,805 | 87 | 1.25 |
| <i>Oreochromis niloticus</i>  | 21,431 | 180   | 15,780 | 14 | 1.35 |
| <i>Tetraodon nigroviridis</i> | 19,544 | 901   | 14,803 | 57 | 1.26 |

---

167

168     Based on the phylogenetic tree and single-copy sequences, the divergence time  
169 between different species was estimated by MCMCTREE with parameters of “--model  
170 0 --rootage 500 -clock 3”. The results showed that *C. bicolor* was formed  
171 ~34.95 million years ago, when differentiated from the common ancestor with *L. crocea*  
172 (Figure 8).

173

#### 174 **Analysis of bicolor formation in teleosts**

175 Current studies suggest that different pigment cells produce different pigments. Some  
176 types of pigment cells already have been identified in teleost<sup>[29]</sup>. *C. bicolor* has an  
177 attractive body color with clear color boundaries, but the molecular mechanism  
178 underlying this remains unknown. Compared with other teleost, there are 1,081  
179 expanded gene families and 57 specific gene families in *C. bicolor* (Figure 9).  
180 Functional enrichment analysis showed that notable expansion occurred in those gene  
181 families related to visual development and enzyme metabolism (Figure 9).

182

183 **Re-use Potential**

184 Coral reef fishes, with distinctive color patterns and color morphs, are important for  
185 understanding the adaptive evolution of fishes. In this study, we firstly assembled a  
186 high-quality, chromosome-level genome of *C. bicolor*, with a length of 681 Mbp, and  
187 annotated 21,774 genes. This is the first genome of a fish from the Pomacanthidae  
188 family. These genomic data will be useful for genome-scale comparisons and further  
189 studies on the mechanisms underlying colorful body development and adaptation.

190

191 **Data Availability**

192 The data sets supporting the results of this article are available in the GigaScience  
193 Database, doi: 10.5524/100802. Raw reads from genome sequencing and assembly  
194 are deposited at the China National Gene Bank under reference number CNP0001160,  
195 which contains sample information (CNS0315939), Hi-C raw data (CNX0286336)  
196 and stLFR raw data (CNX0286337). The project also has been deposited at NCBI  
197 under accession ID PRJNA702283.

198

199 **Declarations**

200 **List of Abbreviations**

201 bp: base pair; BUSCO: Benchmarking Universal Single-Copy Orthologs; Gbp:



202 gigabase pair; Kbp: kilobase pair; KEGG: Kyoto Encyclopedia of Genes and Genomes;  
203 Mbp: megabase pair; NCBI: National Center for Biotechnology Information; stLFR:  
204 single-tube long fragment reads; TE: transposable element.

205

### 206 **Ethical Approval**

207 All resources used in this study were approved by the Institutional Review Board of  
208 BGI (IRB approval No. FT17007). This experiment has passed the ethics audit of the  
209 Beijing Genomics Institute (BGI) Gene Bioethics and Biosecurity Review Committee.

210

### 211 **Consent for Publication**

212 Not applicable.

213

### 214 **Competing Interests**

215 The authors declare that they have no competing interests.

216

### 217 **Funding**

218 This work was supported by funding from the “Blue Granary” project for scientific  
219 and technological innovation of China (2018YFD0900301-05).

220

221 **Authors' Contributions**

222 H.Z. and G.F. designed this project. M.Z. prepared the samples. S.L., S.P., W.X., C.W.  
223 and C.M. conducted the experiments. C.L., X.Y., L.S., R.Z. and Q.L. did the analyses.  
224 C.L., X.Y., L.S., R.Z. wrote and revised the manuscript. All authors read and  
225 approved the final version of the manuscript.

226

227 **Acknowledgements**

228 We thank the China National Genebank for technical support in constructing and  
229 sequencing the stLFR library.

230

231 **References**

- 232 1. Mendonça RC, Chen JY, Zeng C, Tsuzuki MY. Embryonic and early larval  
233 development of two marine angelfish, *Centropyge bicolor* and *Centropyge bispinosa*.  
234 *Zygote*. 2020; doi: 10.1017/S0967199419000789.
- 235 2. Li C, Yang X, Shao L, Zhang R, Zhang M, Liu S, et al.. Protocols for " Bicolor  
236 Angelfish ( *Centropyge bicolor* ) genome provided first chromosome-level reference  
237 of Pomacanthidae family and clues for bi-color body formation ". :10–12020;

- 
- 238 3. Wang O, Chin R, Cheng X, Yan Wu MK, Mao Q, Tang J, et al.. Efficient and  
239 unique cobarcoding of second-generation sequencing reads from long DNA  
240 molecules enabling cost-effective and accurate sequencing, haplotyping, and de novo  
241 assembly. *Genome Res.* 2019; doi: 10.1101/gr.245126.118.
- 242 4. Chen Y, Chen Y, Shi C, Huang Z, Zhang Y, Li S, et al.. SOAPnuke: A MapReduce  
243 acceleration-supported software for integrated quality control and preprocessing of  
244 high-throughput sequencing data. *Gigascience.* 2018; doi:  
245 10.1093/gigascience/gix120.
- 246 5. Chen C-J, Servant N, Heard E, Lajoie BR, Viara E, Varoquaux N, et al.. HiC-Pro:  
247 an optimized and flexible pipeline for Hi-C data processing. *Genome Biol.* 2015; doi:  
248 10.1186/s13059-015-0831-x.
- 249 6. Vurture GW, Sedlazeck FJ, Nattestad M, Underwood CJ, Fang H, Gurtowski J, et  
250 al.. GenomeScope: Fast reference-free genome profiling from short reads.  
251 *Bioinformatics.* 2017; doi: 10.1093/bioinformatics/btx153.
- 252 7. Wong KHY, Levy-Sakin M, Kwok PY. De novo human genome assemblies reveal  
253 spectrum of alternative haplotypes in diverse populations. *Nat Commun.* 2018; doi:  
254 10.1038/s41467-018-05513-w.
- 255 8. Durand NC, Shamim MS, Machol I, Rao SSP, Huntley MH, Lander ES, et al..  
256 Juicer Provides a One-Click System for Analyzing Loop-Resolution Hi-C  
257 Experiments. *Cell Syst.* 2016; doi: 10.1016/j.cels.2016.07.002.

- 
- 258 9. Dudchenko O, Batra SS, Omer AD, Nyquist SK, Hoeger M, Durand NC, et al.. De  
259 novo assembly of the *Aedes aegypti* genome using Hi-C yields chromosome-length  
260 scaffolds. *Science* (80- ). 2017; doi: 10.1126/science.aal3327.
- 261 10. Waterhouse RM, Seppey M, Sim FA, Ioannidis P. BUSCO Applications from  
262 Quality Assessments to Gene Prediction and Phylogenomics Letter Fast Track. 2017;  
263 doi: 10.1093/molbev/msx319.
- 264 11. Wang Y, Tang H, DeBarry JD, Tan X, Li J, Wang X, et al.. MCScanX: a toolkit  
265 for detection and evolutionary analysis of gene synteny and collinearity. *Nucleic  
266 Acids Res.* 2012; doi: 10.1093/nar/gkr1293.
- 267 12. Meng G, Li Y, Yang C, Liu S. MitoZ: A toolkit for animal mitochondrial genome  
268 assembly, annotation and visualization. *Nucleic Acids Res.* 2019; doi:  
269 10.1093/nar/gkz173.
- 270 13. Tillich M, Lehwark P, Pellizzer T, Ulbricht-Jones ES, Fischer A, Bock R, et al..  
271 GeSeq – versatile and accurate annotation of organelle genomes. *Nucleic Acids Res.*  
272 2017; doi: 10.1093/nar/gkx391.
- 273 14. Tarailo-Graovac M, Chen N. Using RepeatMasker to identify repetitive elements  
274 in genomic sequences. *Curr Protoc Bioinforma.* 2009; doi:  
275 10.1002/0471250953.bi0410s25.
- 276 15. Carrillo-Avila M, Resende EK, Marques DKS, Galetti PM. Tandem repeats finder:  
277 a program to analyze DNA sequences. *Conserv Genet.* 2009; doi:

- 
- 278 10.1590/S1679-62252007000200018.
- 279 16. Bao W, Kojima KK, Kohany O. Repbase Update, a database of repetitive  
280 elements in eukaryotic genomes. *Mob DNA*. 2015; doi: 10.1186/s13100-015-0041-9.
- 281 17. Xu Z, Wang H. LTR\_FINDER: an efficient tool for the prediction of full-length  
282 LTR retrotransposons. *Nucleic Acids Res*. 2007; doi: 10.1093/nar/gkm286.
- 283 18. Storer J, Hubley R, Rosen J, Wheeler TJ, Smit AF. The Dfam community  
284 resource of transposable element families, sequence models, and genome annotations.  
285 *Mob DNA*. 2021; doi: 10.1186/s13100-020-00230-y.
- 286 19. Stanke M, Schöffmann O, Morgenstern B, Waack S. Gene prediction in  
287 eukaryotes with a generalized hidden Markov model that uses hints from external  
288 sources. *BMC Bioinformatics*. 2006; doi: 10.1186/1471-2105-7-62.
- 289 20. Stanke M, Keller O, Gunduz I, Hayes A, Waack S, Morgenstern B. AUGUSTUS:  
290 ab initio prediction of alternative transcripts. *Nucleic Acids Res*. 2006; doi:  
291 10.1093/nar/gkl200.
- 292 21. Doerks T, Copley RR, Schultz J, Ponting CP, Bork P. Systematic identification of  
293 novel protein domain families associated with nuclear functions. *Genome Res*. 2002;  
294 doi: 10.1101/gr.203201.
- 295 22. Lewis S, Searle S, Harris N, Gibson M, Iyer V, Richter J, et al.. Creating a honey  
296 bee consensus gene set. *Genome Biol*. 2002; doi:

- 297 10.1186/gb-2002-3-12-research0082.
- 298 23. Bairoch A. The SWISS-PROT protein sequence database and its supplement  
299 TrEMBL in 2000. *Nucleic Acids Res.* 2000; doi: 10.1093/nar/28.1.45.
- 300 24. Habermann BH, Villaveces JM, Jimenez RC. KEGGViewer, a BioJS component  
301 to visualize KEGG Pathways. *F1000Research.* 2014; doi:  
302 10.12688/f1000research.3-43.v1.
- 303 25. Jones P, Binns D, Chang HY, Fraser M, Li W, McAnulla C, et al.. InterProScan 5:  
304 Genome-scale protein function classification. *Bioinformatics.* 2014; doi:  
305 10.1093/bioinformatics/btu031.
- 306 26. Altschul SF, Gish W, Miller W, Myers EW, Lipman DJ. Basic local alignment  
307 search tool. *J Mol Biol.* 1990; doi: 10.1016/S0022-2836(05)80360-2.
- 308 27. Ruan J, Li H, Chen Z, Coghlan A, Coin LJM, Guo Y, et al.. TreeFam: 2008  
309 Update. *Nucleic Acids Res.* 2007; doi: 10.1093/nar/gkm1005.
- 310 28. Guindon S, Dufayard JF, Lefort V, Anisimova M, Hordijk W, Gascuel O. New  
311 algorithms and methods to estimate maximum-likelihood phylogenies: Assessing the  
312 performance of PhyML 3.0. *Syst Biol.* 2010; doi: 10.1093/sysbio/syq010.
- 313 29. Kimura T, Nagao Y, Hashimoto H, Yamamoto-Shiraishi YI, Yamamoto S, Yabe  
314 T, et al.. Leucophores are similar to xanthophores in their specification and  
315 differentiation processes in medaka. *Proc Natl Acad Sci U S A.* 2014; doi:

316 10.1073/pnas.1311254111.

317

318

319 **Figure Legends**

320 **Figure 1.** Photograph of *Centropyge bicolor*.

321 **Figure 2.** Protocols for BGISEQ-500, stLRF and Hi-C library preparation and  
322 construction, and genome assembly, for the Bicolor Angelfish, *Centropyge bicolor*<sup>[2]</sup>.

323 **Figure 3.** The 17-mer depth distribution of *Centropyge bicolor*.

324 The estimated genome size is 662.27 Mbp and the heterozygosity is 1.16%.

325 **Figure 4.** Annotation of the *Centropyge bicolor* genome. **(A)** Basic genomic elements  
326 of the *Centropyge bicolor* genome. LTR, long terminal repeat; LINE, long  
327 interspersed nuclear elements; SINE, short interspersed elements. **(B)** Physical map of  
328 mitochondrial assembly.

329 **Figure 5.** Heat map of interactive intensity between chromosome sequences.

330 **Figure 6.** Homologous chromosomal regions between *Centropyge bicolor* and  
331 *Oryzias latipes*.

332 **Figure 7.** Venn diagram of orthologous gene families.

333 Four teleost species (*Centropyge bicolor*, *Larimichthys crocea*, *Oreochromis niloticus*,  
334 and *Danio rerio*) were used to generate the Venn diagram based on gene family  
335 cluster analysis.



---

336 **Figure 8.** Comparative analysis of the *Centropyge bicolor* genome.

337 (A) The protein-coding genes of the eight species were clustered into 17,849 gene  
338 families. Among these gene families, 4,450 were single-copy gene families. (B)  
339 Phylogenetic analysis of *Centropyge bicolor* (Cbi.), *Danio rerio* (Dre.), *Gasterosteus*  
340 *aculeatus* (Gac.), *Gadus morhua* (Gmo.), *Larimichthys crocea* (Lcr.), *Oryzias latipes*  
341 (Ola.), *Oreochromis niloticus* (Oni.), and *Tetraodon nigroviridis* (Tni.) using  
342 single-copy gene families. The species differentiation time between *Centropyge*  
343 *bicolor* and *Larimichthys crocea* was ~34.95 million years.

344 **Figure 9.** Statistics of gene function enrichment (Gene Ontology) for expanded genes  
345 of *Centropyge bicolor*.

346 Nodes are colored by  $q$ -value (adjusted  $p$ -value). Node size is shown according to its  
347 enriched gene number.

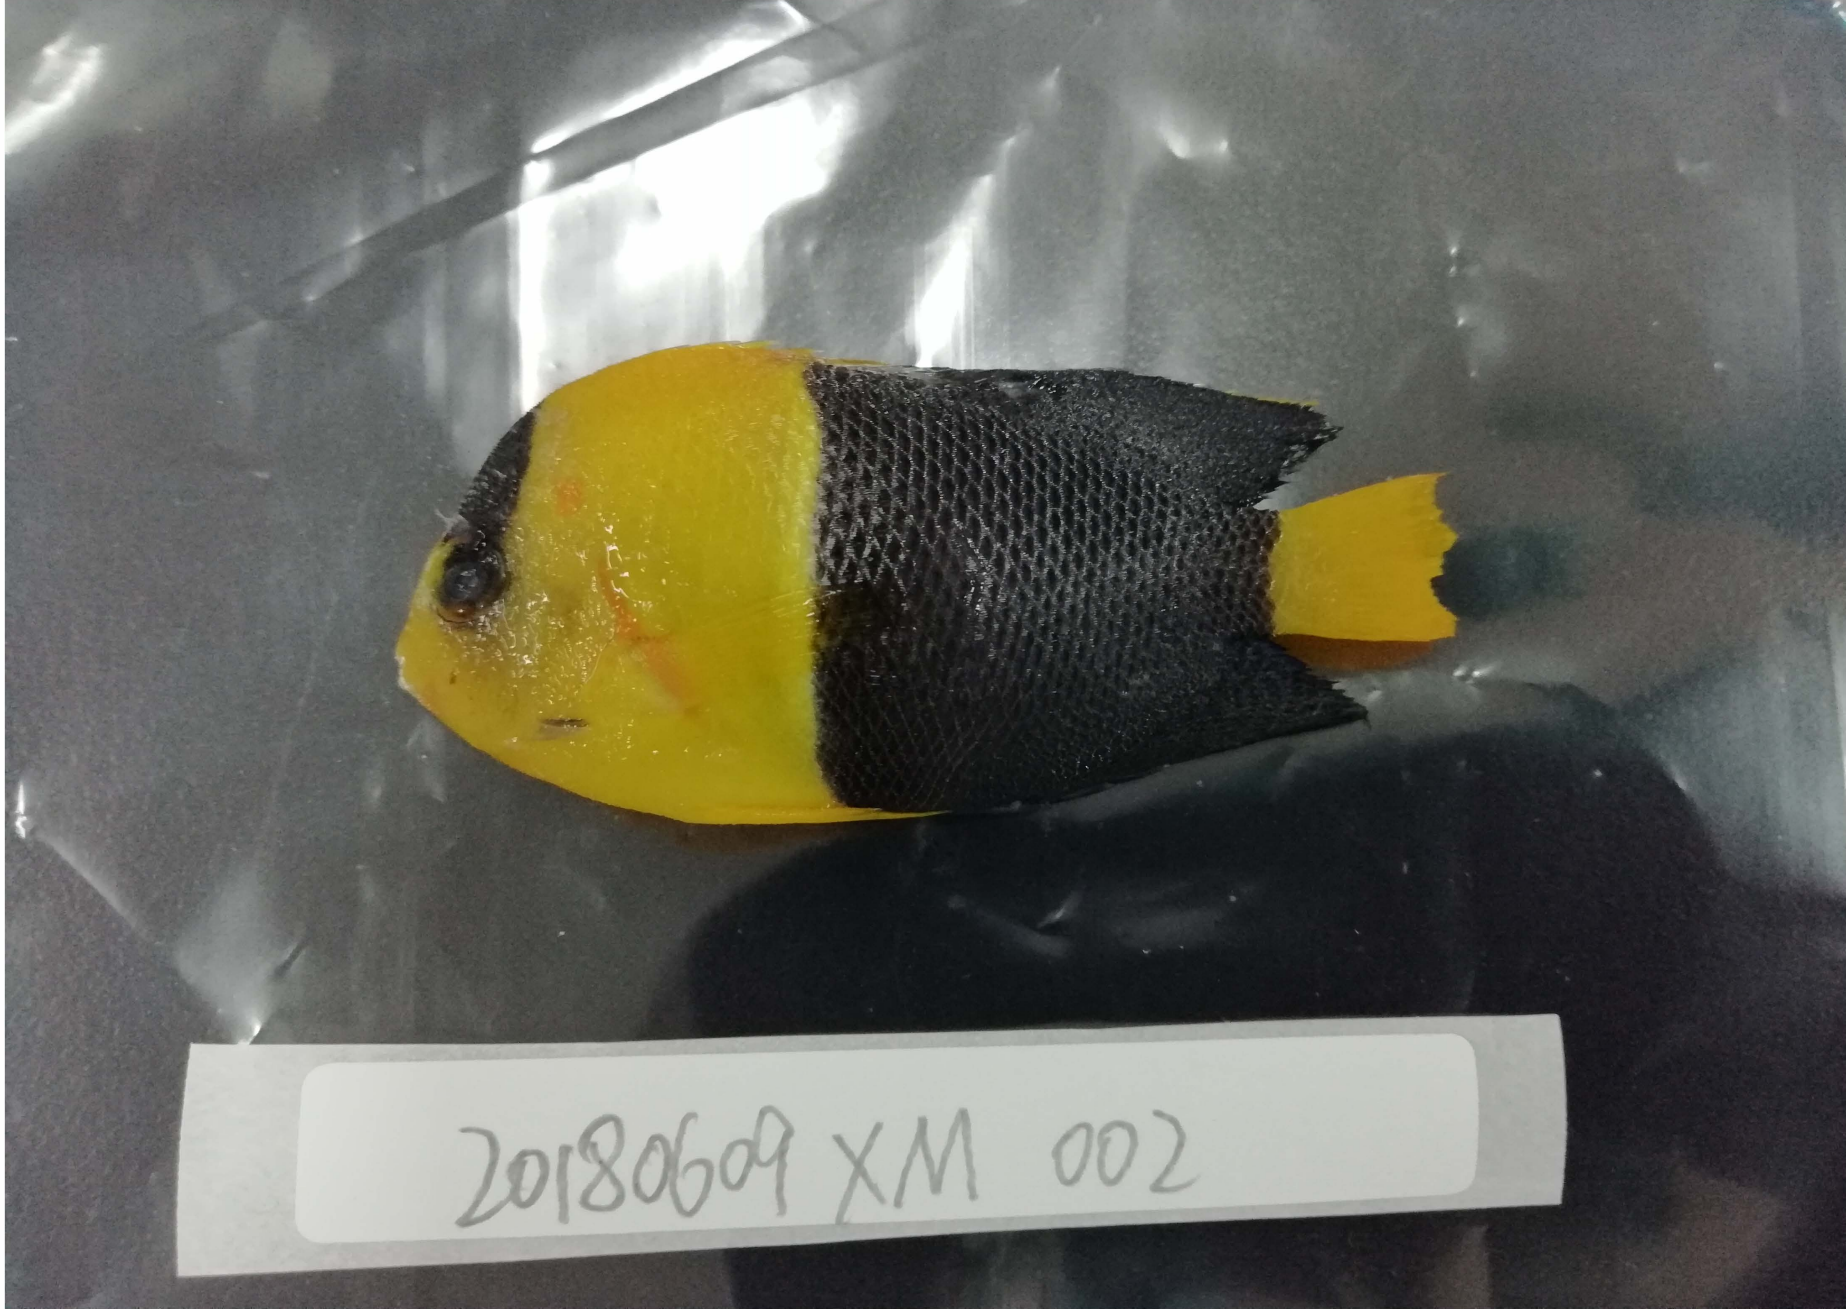

20180609 XM 002

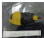

Nov 21, 2020

☆ Bookmark

📄 Copy / Fork

## 📄 Protocols for "Bicolor Angelfish (*Centropyge bicolor*) genome provided first chromosome-level reference of Pomacanthidae family and clues for bi-color body formation" ▾

Chunhua Li<sup>1</sup>, Jianwei Yang<sup>1</sup>, Libin Shao<sup>1</sup>, Rui Zhang<sup>1</sup>, QunLiu<sup>1</sup>, Mengqi Zhang<sup>1</sup>, Shanshan Liu<sup>2</sup>, Shanshan Fan<sup>2</sup>, Weizhen Xue<sup>1</sup>, Congyan Wang<sup>1</sup>, Chunyan Mao<sup>1</sup>, He Zhang<sup>2</sup>, Guangyi Fan<sup>1</sup>

<sup>1</sup>BGI-Qingdao, BGI-Shenzhen, Qingdao 266555, China,

<sup>2</sup>BGI-Qingdao, BGI-Shenzhen, Qingdao 266555, China, Department of Biology, Hong Kong Baptist University, Hong Kong, China

1 Watch for me

🗨️ Share

[doi.org/10.17554/protocols.io/bpzdmpj8](https://doi.org/10.17554/protocols.io/bpzdmpj8)

👤 lichunhua 🏠

# GenomeScope Profile

len:622,282,889bp uniq:62.4% het:1.16% kcov:39.6 err:0.105% dup:3.43% k:17

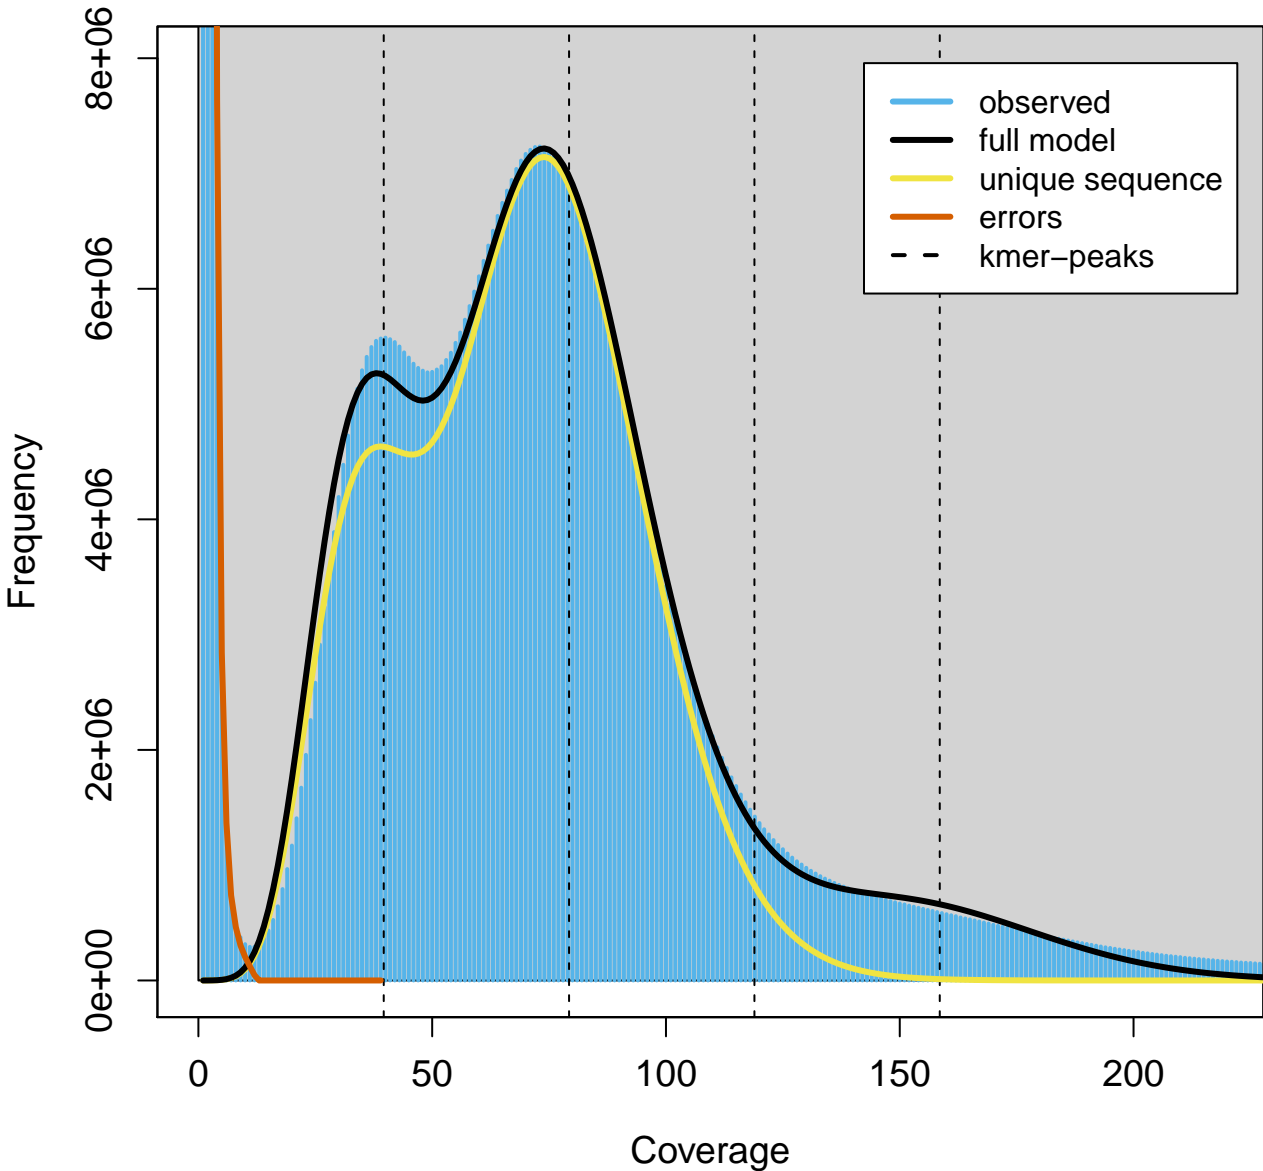

A

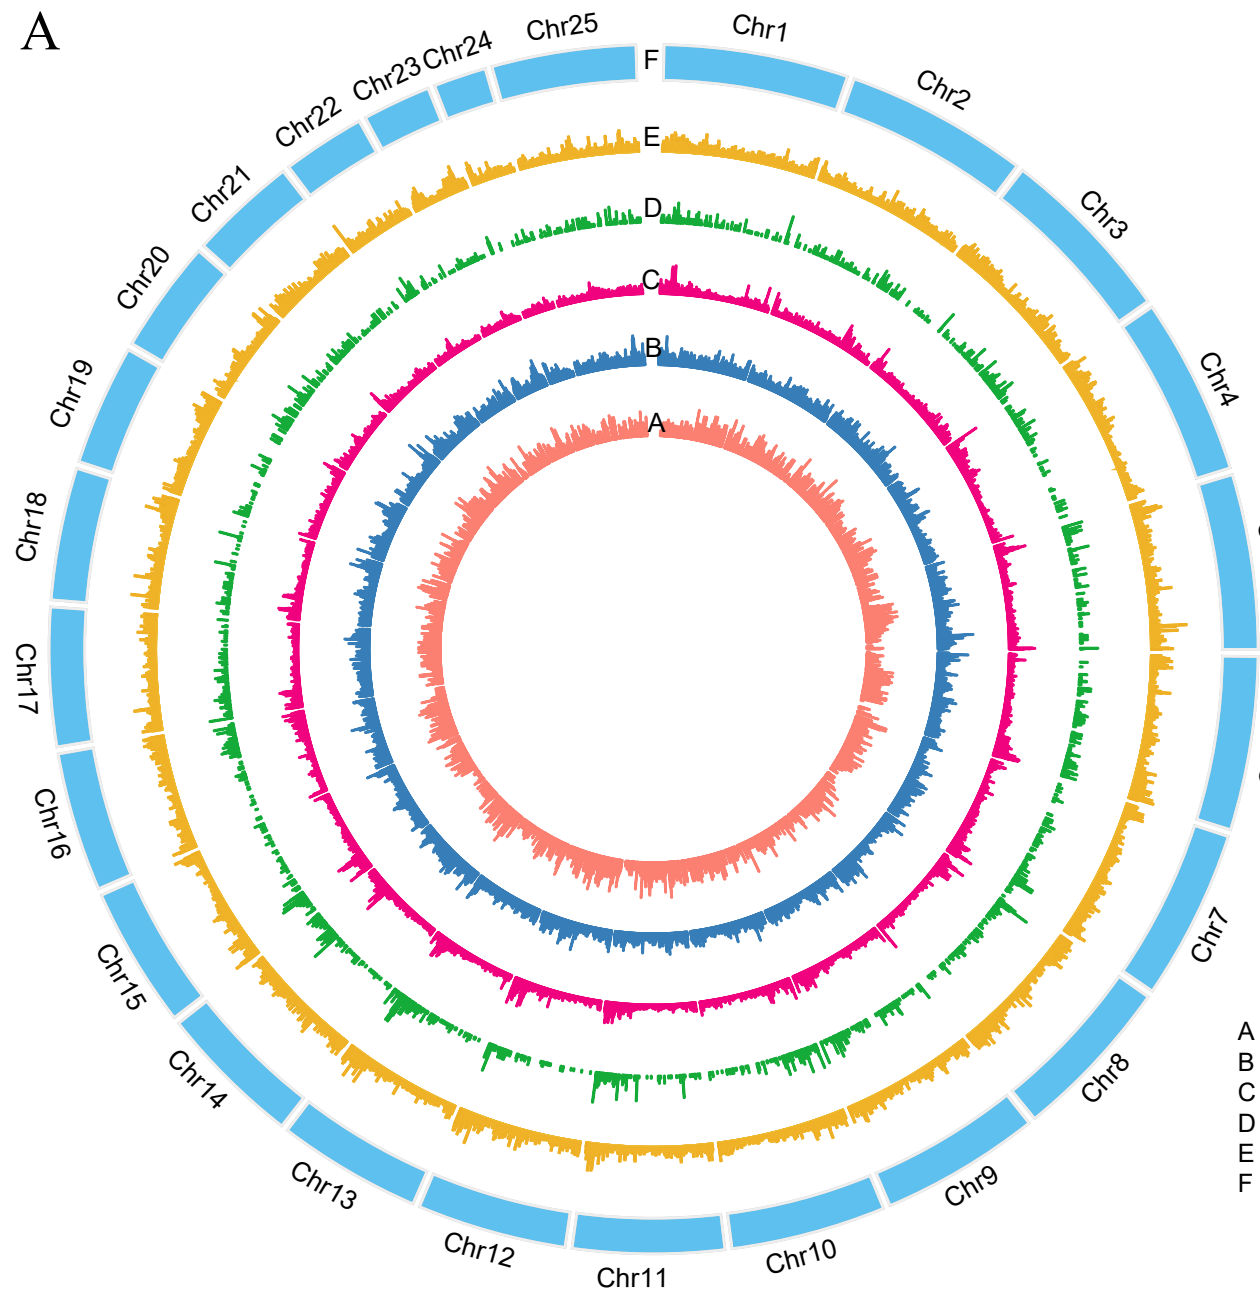

B

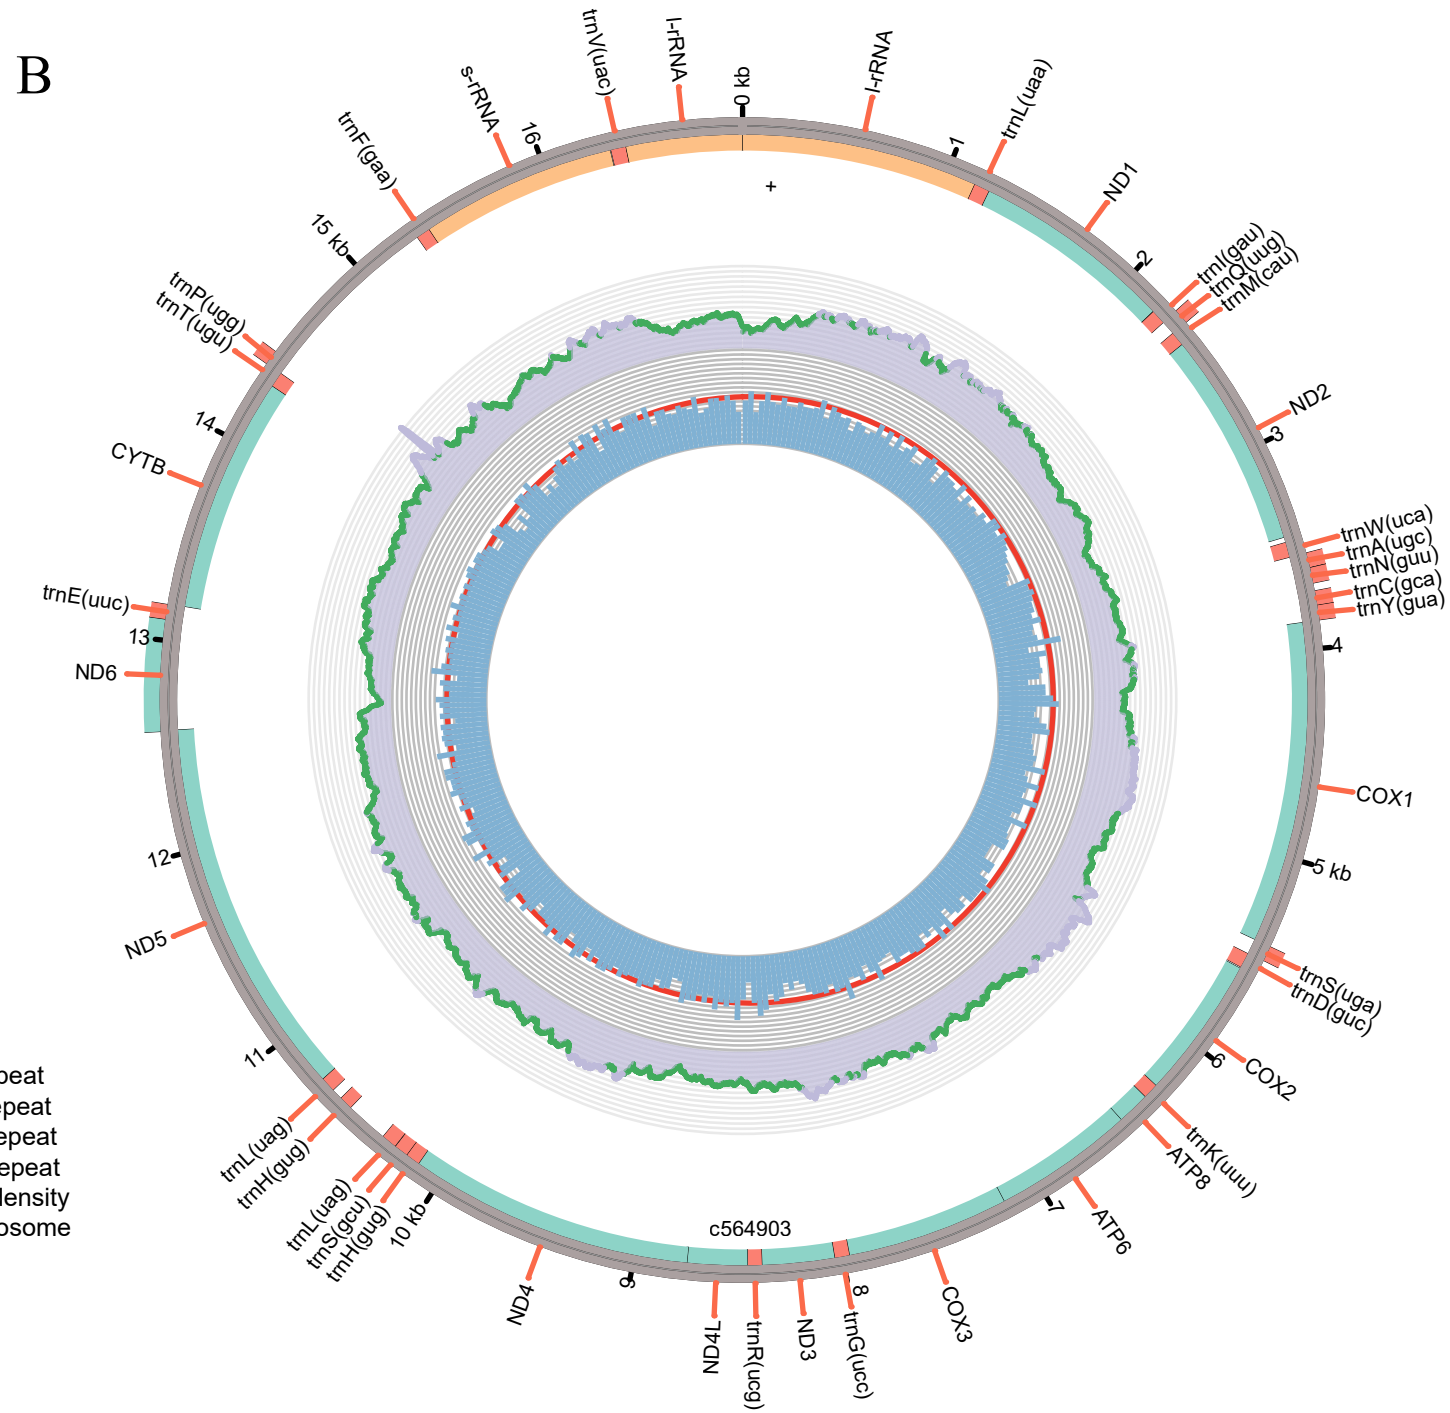





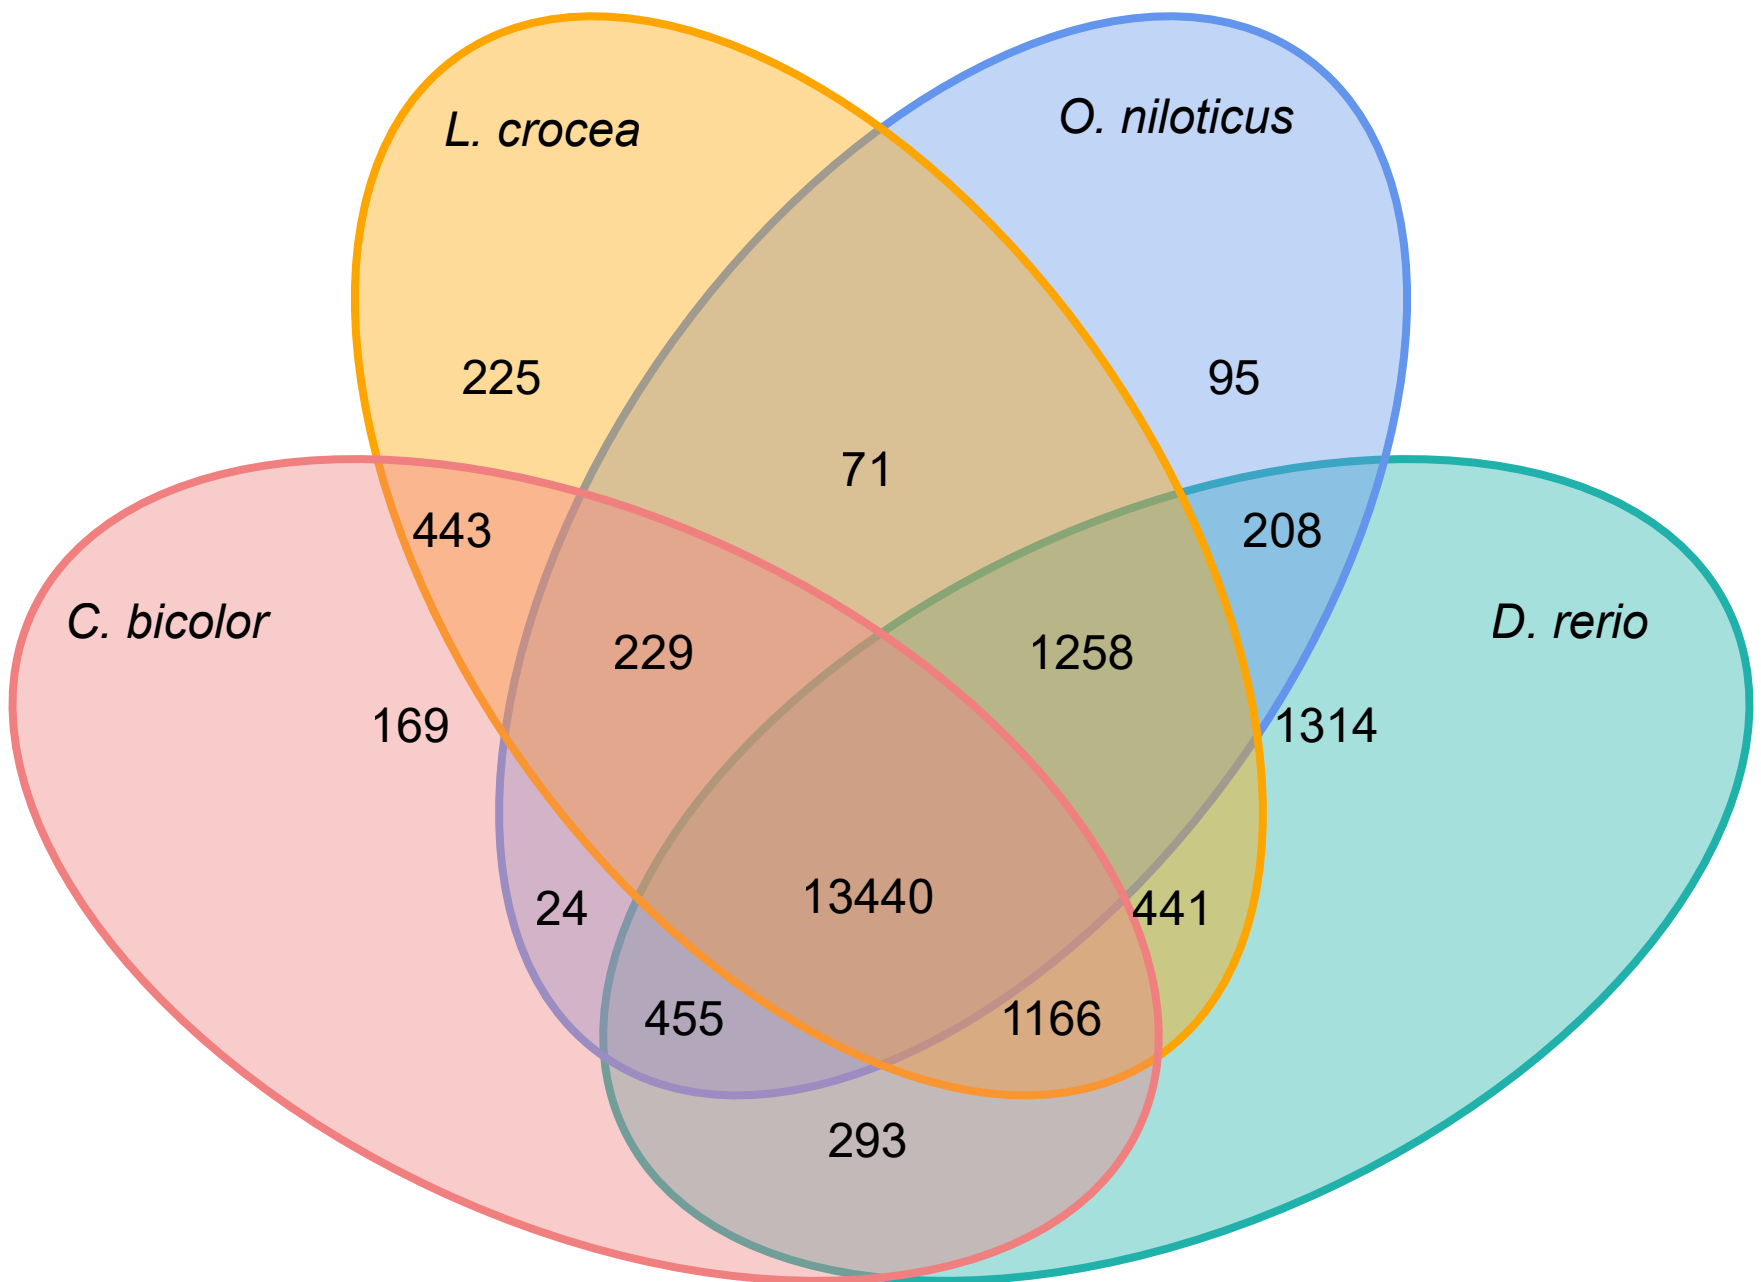

Number of gene families

Gene families  
Expansion / Contraction

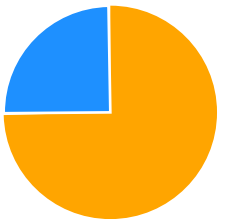

Combined Change  
Across Lineages

MRCA  
(17849)

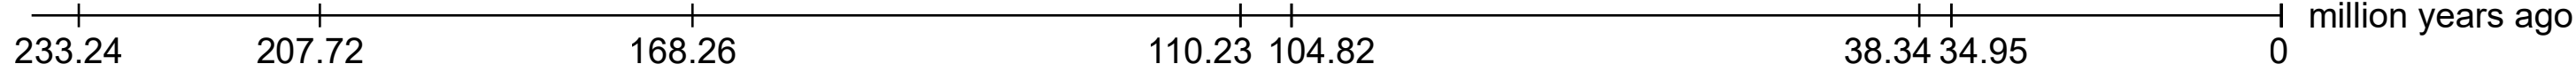

- Ola +325 / -2860
- Oni +687 / -1074
- Cbi +1081 / -2212
- Lcr +1984 / -922
- Gac +408 / -3181
- Tni +1032 / -4082
- Gmo +628 / -3821
- Dre +2939 / -1869

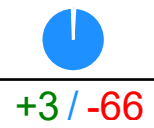

+3 / -66

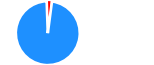

+17 / -254

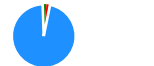

+236 / -231

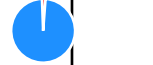

+6 / -109

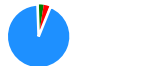

+454 / -536

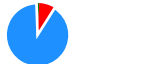

+148 / -1357



# Statistics of Enrichment

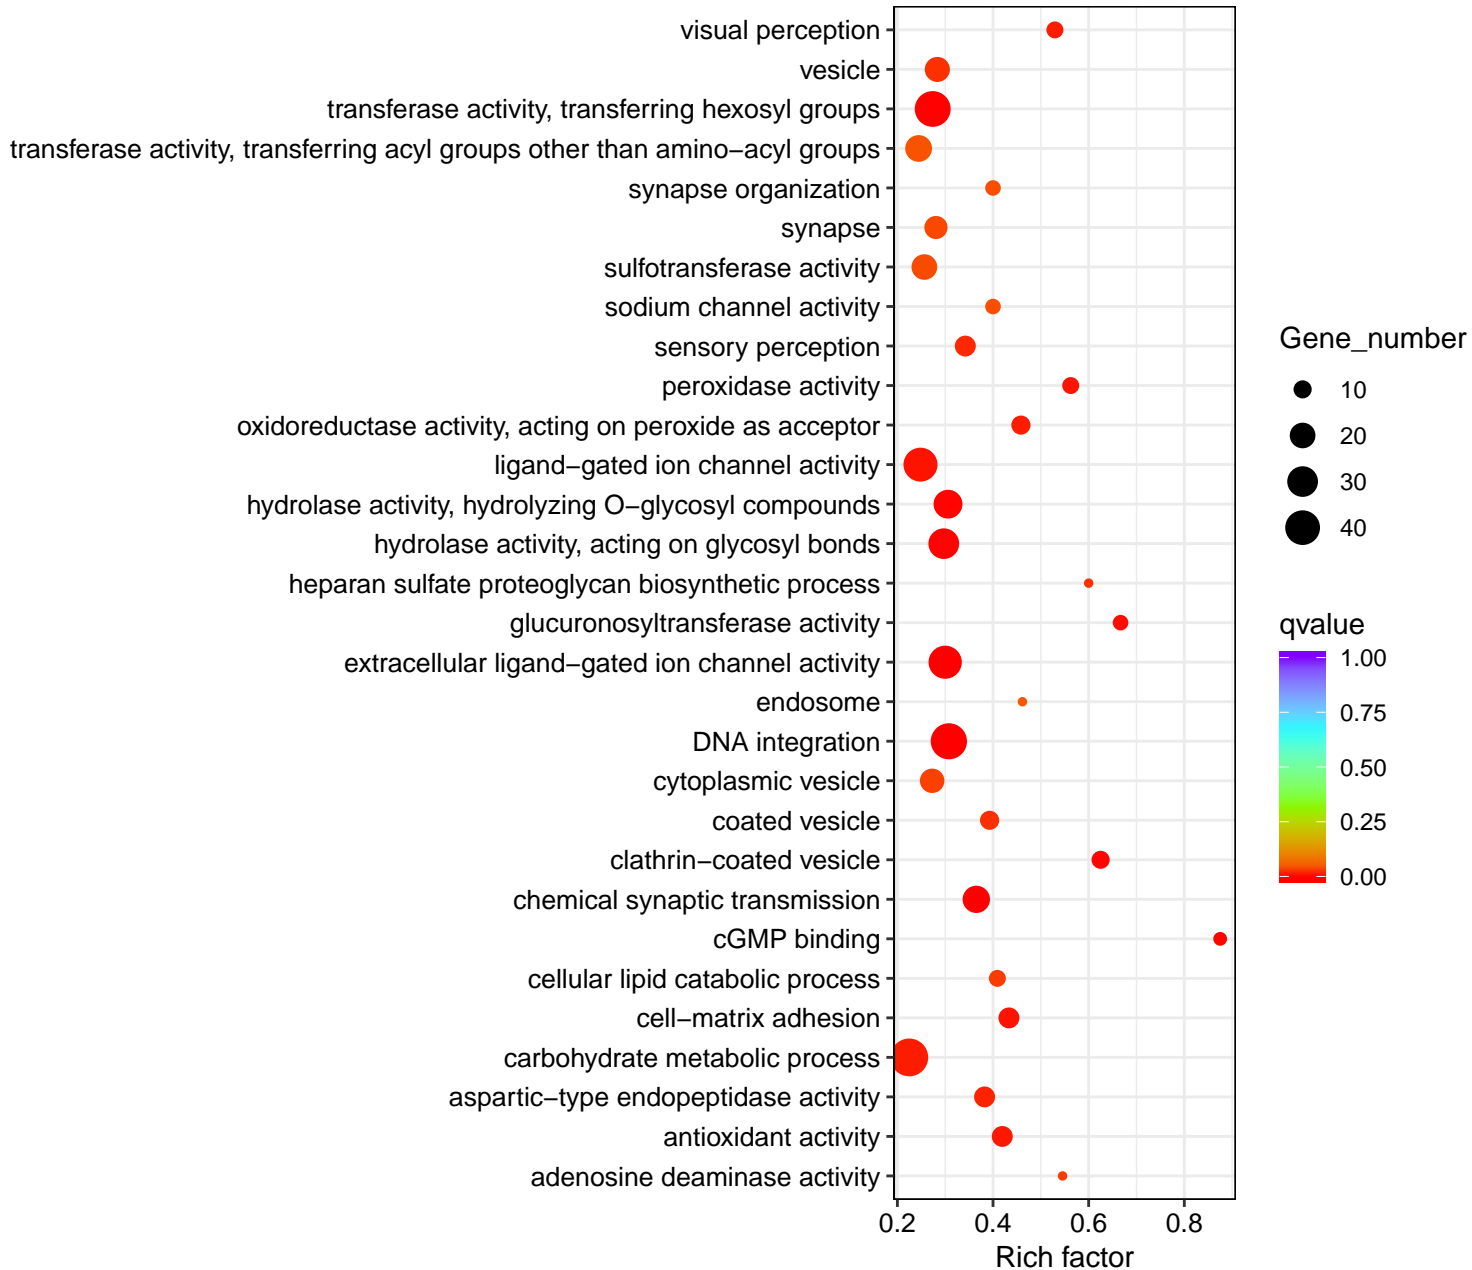

Source: https://www.biorxiv.org/content/biorxiv/early/2021/10/24/2021.10.24.465606.full.pdf
